# Supplementary material for: The Effect of Solvents on the Crystal Morphology of Isosorbide Mononitrate and Its Molecular Mechanisms
Source: MDPI journal article supplement (doi:10.3390/molecules29020367), 2024-01-11
Supplement: s1 [file s1]

**Supplementary Material for: The Effect of Solvents on the Crystal Morphology of  
Isosorbide Mononitrate and its Molecular Mechanisms**

The size of the simulation box constructed for each crystal face system and the number of molecules contained are shown below.

**Table S1** The size of the simulated box and the number of solvent molecules contained in the  
CH<sub>2</sub>Cl<sub>2</sub> solvent system

| (h k l)  | a (Å) | b (Å) | c (Å)  | T <sub>c</sub> <sup>a</sup> (Å) | T <sub>s</sub> <sup>b</sup> (Å) | α (°) | β (°) | γ (°) | N <sub>CH<sub>2</sub>Cl<sub>2</sub></sub> |
|----------|-------|-------|--------|---------------------------------|---------------------------------|-------|-------|-------|-------------------------------------------|
| (1 0 0)  | 46.26 | 52.58 | 189.27 | 30.84                           | 43.75                           | 90    | 90    | 90    | 1000                                      |
| (1 1 0)  | 52.58 | 65.42 | 179.98 | 32.71                           | 30.93                           | 90    | 90    | 90    | 1000                                      |
| (1 1 1)  | 99.38 | 67.05 | 180.20 | 22.52                           | 39.92                           | 90    | 90    | 90    | 2500                                      |
| (1 1 -1) | 99.38 | 67.05 | 180.46 | 22.52                           | 39.92                           | 90    | 90    | 90    | 2500                                      |
| (1 0 1)  | 50.28 | 46.26 | 185.06 | 24.18                           | 45.75                           | 90    | 90    | 90    | 1000                                      |
| (1 0 -1) | 46.26 | 50.28 | 187.79 | 24.18                           | 45.74                           | 90    | 90    | 90    | 1000                                      |

<sup>a</sup> T<sub>c</sub> is the thickness of the crystal face layer in Å.

<sup>b</sup> T<sub>s</sub> is the thickness of the solvent layer in Å.

**Table S2** The size of the simulated box and the number of solvent molecules contained in the  
CH<sub>2</sub>Cl<sub>2</sub>-C<sub>6</sub>H<sub>14</sub> solvent system

| (h k l)  | a (Å) | b (Å) | c (Å)  | T <sub>c</sub> <sup>a</sup> (Å) | T <sub>s</sub> <sup>b</sup> (Å) | α (°) | β (°) | γ (°) | N <sub>CH<sub>2</sub>Cl<sub>2</sub></sub> | N <sub>C<sub>6</sub>H<sub>14</sub></sub> |
|----------|-------|-------|--------|---------------------------------|---------------------------------|-------|-------|-------|-------------------------------------------|------------------------------------------|
| (1 0 0)  | 46.26 | 52.58 | 201.54 | 30.84                           | 53.60                           | 90    | 90    | 90    | 817                                       | 200                                      |
| (1 1 0)  | 52.58 | 65.42 | 190.26 | 32.71                           | 37.90                           | 90    | 90    | 90    | 817                                       | 200                                      |
| (1 1 1)  | 99.38 | 67.05 | 190.89 | 22.52                           | 48.89                           | 90    | 90    | 90    | 2041                                      | 500                                      |
| (1 1 -1) | 99.38 | 67.05 | 191.17 | 22.52                           | 48.89                           | 90    | 90    | 90    | 2041                                      | 500                                      |
| (1 0 1)  | 50.28 | 46.26 | 196.53 | 24.18                           | 56.05                           | 90    | 90    | 90    | 817                                       | 200                                      |
| (1 0 -1) | 46.26 | 50.28 | 200.68 | 24.18                           | 56.05                           | 90    | 90    | 90    | 817                                       | 200                                      |

Note: The meanings of the physical quantities in the table are the same as in **Table S1**.
